# Supplementary material for: Multi-omics reveals that green pea (Pisum sativum L.) hull supplementation ameliorates non-alcoholic fatty liver disease via the SHMT2/glycine/mTOR/PPAR-γ signaling pathway
Source: Royal Society of Chemistry journal article supplement (doi:10.1039/d3fo01771k), 2023-01-01
Supplement: d3fo01771k1.pdf [file d3fo01771k1.pdf]

## Supplementary material

**Table S1** Basic composition of green pea hulls

| Moisture | Ash   | Protein | Fat | Dietary Fiber | Polyphenols       |
|----------|-------|---------|-----|---------------|-------------------|
| 6.73%    | 3.14% | 13.1%   | 1%  | 59.2%         | 6.54 mg GAE/g GPH |

GAE: Gallic acid equivalent.

GPH: Green pea hulls.

**Table S2** Diet formula

| <b>Ingredient</b>     | <b>HFD (g)</b> | <b>LGPH (g)</b> | <b>HGPH (g)</b> |
|-----------------------|----------------|-----------------|-----------------|
| Pea hull              | 0              | 50              | 200             |
| Casein                | 195            | 188             | 169             |
| Corn starch           | 150            | 142             | 118             |
| Sucrose               | 341            | 341             | 341             |
| Anhydrous cream       | 210            | 210             | 208             |
| Cellulose             | 50             | 50              | 50              |
| Vitamins and minerals | 49             | 49              | 49              |
| DL-Methionine         | 3              | 3               | 3               |
| Choline bitartrate    | 3              | 3               | 3               |
| Cholesterol           | 22             | 22              | 22              |
| TBHQ                  | 0.042          | 0.042           | 0.042           |
| Weight                | 1023.042       | 1058.042        | 1163.042        |
| Energy (Kcal)         | 4646           | 4649            | 4648            |
