# Supplementary figures and images for: Multi-omics reveals that green pea (Pisum sativum L.) hull supplementation ameliorates non-alcoholic fatty liver disease via the SHMT2/glycine/mTOR/PPAR-γ signaling pathway
Source: Royal Society of Chemistry journal article supplement (doi:10.1039/d3fo01771k), 2023-01-01

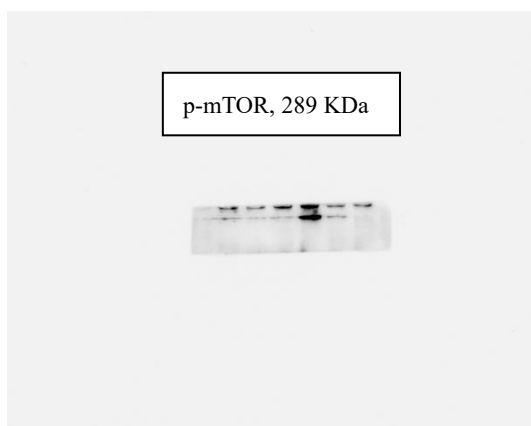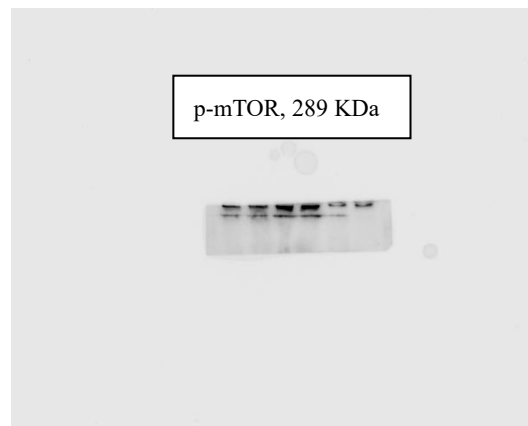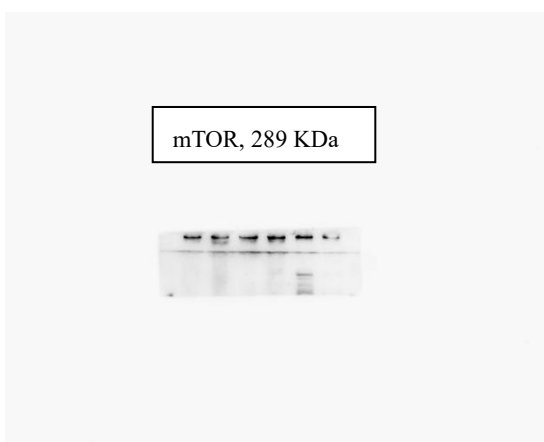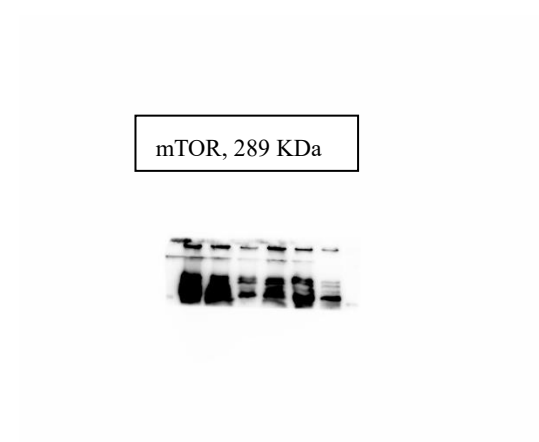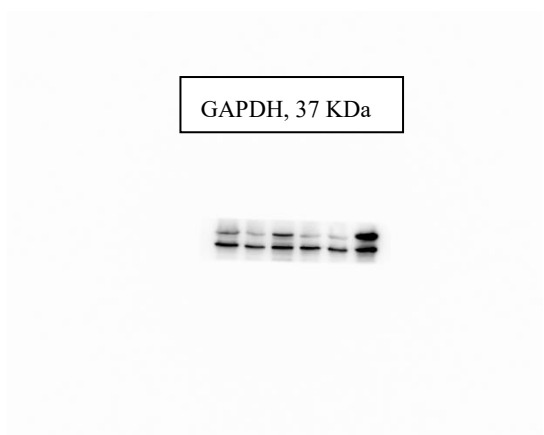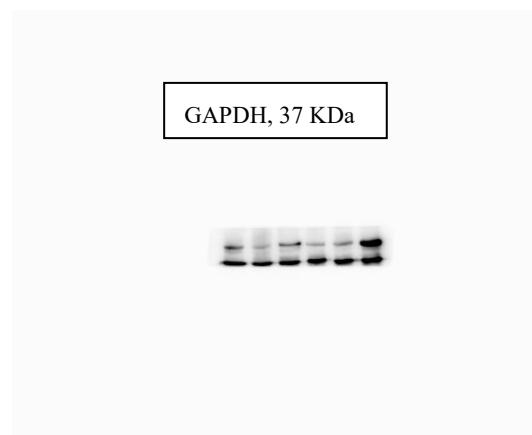

Shmt1, 55 KDa

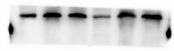

PPAR- $\gamma$ , 54 KDa

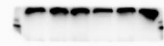

Shmt1, 55 KDa

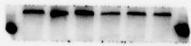

PPAR- $\gamma$ , 54 KDa

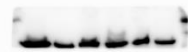

GAPDH, 37 KDa

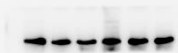

GAPDH, 37 KDa

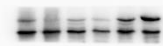

Supplement: d3fo01771k2.pdf [file d3fo01771k2.pdf]
